CORRECTION

# Correction: Morphometry, Bite-Force, and Paleobiology of the Late Miocene Caiman *Purussaurus brasiliensis*

The *PLOS ONE* Staff

In the Funding section, one of the funders is listed incorrectly. The complete, correct funding information is as follows:

The publication cost was fully funded by FAPEMIG and the Graduate Program in Ecology and Conservation of Natural Resources, Federal University of Uberlândia. The links are: <http://www.fapemig.br/> and <http://www.portal.ib.ufu.br/>. The funders had no role in study design, data collection and analysis, decision to publish, or preparation of the manuscript.

## Reference

1. Aureliano T, Ghilardi AM, Guilherme E, Souza-Filho JP, Cavalcanti M, et al. (2015) Morphometry, Bite-Force, and Paleobiology of the Late Miocene Caiman *Purussaurus brasiliensis*. PLoS ONE 10(2): e0117944. doi: [10.1371/journal.pone.0117944](https://doi.org/10.1371/journal.pone.0117944) PMID: [25689140](https://pubmed.ncbi.nlm.nih.gov/25689140/)

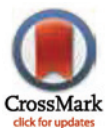

## OPEN ACCESS

**Citation:** The *PLOS ONE* Staff (2015) Correction: Morphometry, Bite-Force, and Paleobiology of the Late Miocene Caiman *Purussaurus brasiliensis*. PLoS ONE 10(3): e0124188. doi:10.1371/journal.pone.0124188

**Published:** March 30, 2015

**Copyright:** © 2015 The PLOS ONE Staff. This is an open access article distributed under the terms of the [Creative Commons Attribution License](https://creativecommons.org/licenses/by/4.0/), which permits unrestricted use, distribution, and reproduction in any medium, provided the original author and source are credited.
